# Supplementary material for: Investigation of the protonation state of the macrocyclic {HnP8W48O184} anion by modeling 183W NMR chemical shifts
Source: Royal Society of Chemistry journal article supplement (doi:10.1039/c7nj00915a), 2017-01-01
Supplement: c7nj00915a1.pdf [file c7nj00915a1.pdf]

## Electronic Supporting Information

# Protonation state of the macrocyclic $\{H_nP_8W_{48}O_{184}\}$ anion by modeling of $^{183}W$ NMR chemical shifts.

Mohamed Haouas<sup>a,\*</sup>, Manal Diab<sup>a</sup>, Mhamad Aly Moussawi<sup>a</sup>, Emmanuel Cadot<sup>a</sup>, Sébastien Floquet<sup>a</sup>, Marc Henry<sup>b</sup>, and Francis Taulelle<sup>a,c</sup>,

<sup>a</sup> *Institut Lavoisier de Versailles UMR CNRS 8180, Université de Versailles Saint Quentin en Yvelines, Université Paris-Saclay, Versailles, France*

<sup>b</sup> *LCMES UMR CNRS 7140, Université de Strasbourg, 67000 Strasbourg, France*

<sup>c</sup> *Centre for Surface Chemistry and Catalysis, KU Leuven, 3001 Heverlee, Belgium.*

**Fig. S1.**  $^{183}W$  NMR spectra in 1 M LiCl  $D_2O$  solution of 2.2 mM  $(NH_4)_{21}Li_{17}H_2[P_8W_{48}O_{184}]$  at a) pH 1.1, b) pH 1.8, c) pH 2.9, d) pH 3.7, e) pH 4.7, f) pH 5.9 and e) pH 7.6.

**Fig. S2.**  $^{183}W$  NMR chemical shifts of  $(NH_4)_{21}Li_{17}H_2[P_8W_{48}O_{184}]$  as a function of a) pH and b) the molar ratio H/POT.

**Table S1.** Cartesian coordinates for  $[P_2W_{18}O_{62}]^{6-}$  in  $H_2O$ .

**Table S2.** Cartesian coordinates for  $\beta$ - $[SiW_{12}O_{40}]^{4-}$  in  $H_2O$ .

**Table S3.** Cartesian coordinates for  $\beta$ - $[SiW_{12}O_{40}]^{4-}$  in DMF.

**Table S4.** Cartesian coordinates for  $\gamma$ - $[SiW_{12}O_{40}]^{4-}$  in DMF.

**Table S5.** Cartesian coordinates for  $[W_{10}O_{32}]^{4-}$  in DMF.

**Table S6.** Cartesian coordinates for  $[8K]C[H_{16}P_8W_{48}O_{184}]^{16-}$ .

**Table S7.** Computed parameters to calculate  $^{183}W$  chemical shifts relative to  $WO_4^{2-}$  for  $[8K]C[H_nP_8W_{48}O_{184}]^{(32-n)-}$ .

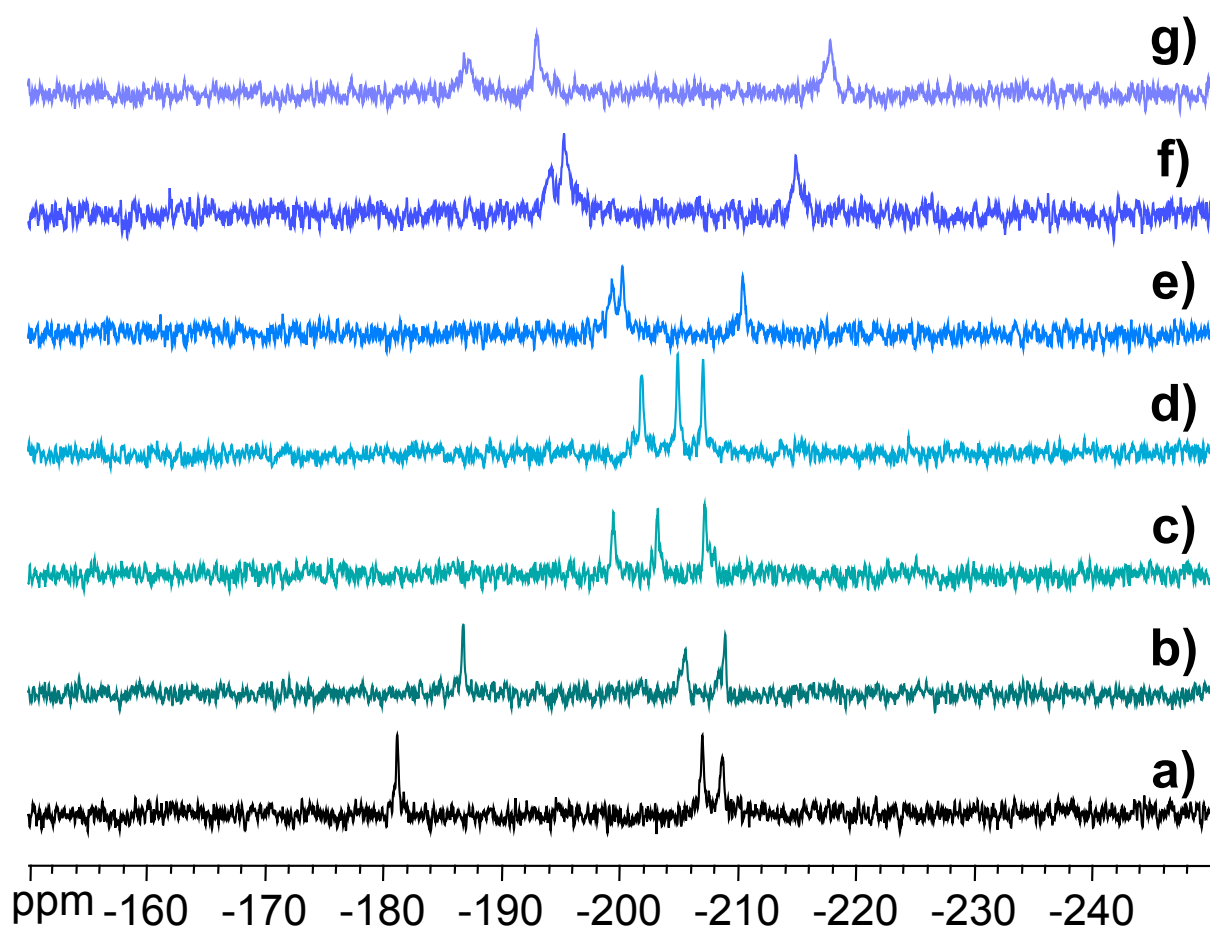

**Fig. S1.**  $^{183}\text{W}$  NMR spectra in 1 M LiCl  $\text{D}_2\text{O}$  solution of 2.2 mM  $(\text{NH}_4)_{21}\text{Li}_{17}\text{H}_2[\text{P}_8\text{W}_{48}\text{O}_{184}]$  at a) pH 1.1, b) pH 1.8, c) pH 2.9, d) pH 3.7, e) pH 4.7, f) pH 5.9 and e) pH 7.6.

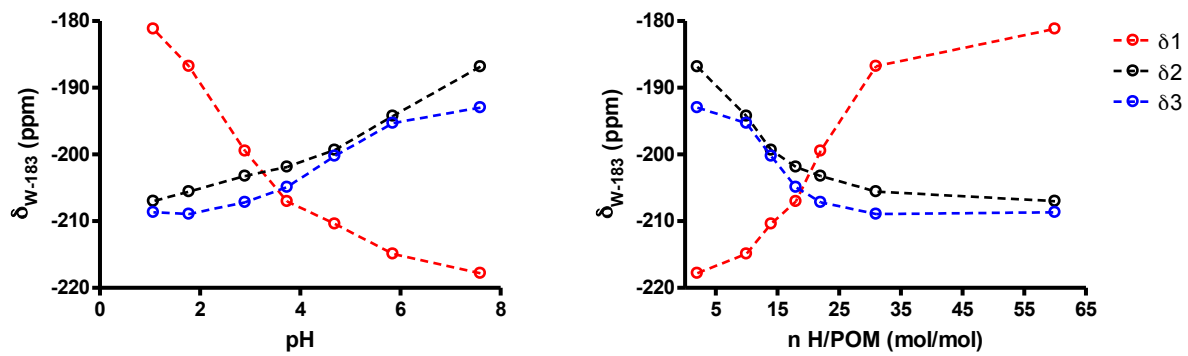

**Fig. S2.**  $^{183}\text{W}$  NMR chemical shifts of  $(\text{NH}_4)_{21}\text{Li}_{17}\text{H}_2[\text{P}_8\text{W}_{48}\text{O}_{184}]$  as a function of a) pH and b) the molar ratio H/POT.

**Table S1.** Cartesian coordinates for  $[\text{P}_2\text{W}_{18}\text{O}_{62}]^{6-}$  in  $\text{H}_2\text{O}^*$ 

82

|     |           |           |           |
|-----|-----------|-----------|-----------|
| W1  | -3.136340 | -1.707846 | -1.898202 |
| W2  | -3.136340 | -1.707846 | 1.898202  |
| W3  | -3.136340 | 1.707846  | -1.898202 |
| W4  | -3.136340 | 1.707846  | 1.898202  |
| W5  | 3.047208  | -1.862227 | -1.898202 |
| W6  | 3.047208  | -1.862227 | 1.898202  |
| W7  | 3.047208  | 1.862227  | -1.898202 |
| W8  | 3.047208  | 1.862227  | 1.898202  |
| W9  | 0.089132  | -3.570073 | -1.898202 |
| W10 | 0.089132  | -3.570073 | 1.898202  |
| W11 | 0.089132  | 3.570073  | -1.898202 |
| W12 | 0.089132  | 3.570073  | 1.898202  |
| W13 | 1.985306  | 0.000000  | -4.973358 |
| W14 | 1.985306  | 0.000000  | 4.973358  |
| W15 | -0.992653 | -1.719325 | -4.973358 |
| W16 | -0.992653 | -1.719325 | 4.973358  |
| W17 | -0.992653 | 1.719325  | -4.973358 |
| W18 | -0.992653 | 1.719325  | 4.973358  |
| P19 | 0.000000  | 0.000000  | -2.012007 |
| P20 | 0.000000  | 0.000000  | 2.012007  |
| O21 | -4.458050 | -2.780049 | -2.230257 |
| O22 | -4.458050 | -2.780049 | 2.230257  |
| O23 | -4.458050 | 2.780049  | -2.230257 |
| O24 | -4.458050 | 2.780049  | 2.230257  |
| O25 | -4.004482 | 0.000000  | -2.158487 |
| O26 | -4.004482 | 0.000000  | 2.158487  |
| O27 | -3.365825 | -1.545223 | 0.000000  |
| O28 | -3.365825 | 1.545223  | 0.000000  |
| O29 | -2.435524 | -1.617555 | -3.711975 |
| O30 | -2.435524 | -1.617555 | 3.711975  |
| O31 | -2.435524 | 1.617555  | -3.711975 |
| O32 | -2.435524 | 1.617555  | 3.711975  |
| O33 | -1.685250 | -2.918938 | -1.563623 |
| O34 | -1.685250 | -2.918938 | 1.563623  |
| O35 | -1.685250 | 2.918938  | -1.563623 |
| O36 | -1.685250 | 2.918938  | 1.563623  |
| O37 | -1.618664 | -2.803609 | -6.172828 |
| O38 | -1.618664 | -2.803609 | 6.172828  |
| O39 | -1.618664 | 2.803609  | -6.172828 |
| O40 | -1.618664 | 2.803609  | 6.172828  |
| O41 | -1.547062 | 0.000000  | -5.695941 |
| O42 | -1.547062 | 0.000000  | 5.695941  |
| O43 | -1.483117 | 0.000000  | -1.544007 |
| O44 | -1.483117 | 0.000000  | 1.544007  |
| O45 | -0.183082 | -2.918003 | -3.711975 |
| O46 | -0.183082 | -2.918003 | 3.711975  |
| O47 | -0.183082 | 2.918003  | -3.711975 |

|     |           |           |           |
|-----|-----------|-----------|-----------|
| O48 | -0.183082 | 2.918003  | 3.711975  |
| O49 | -0.178568 | -5.250809 | -2.230257 |
| O50 | -0.178568 | -5.250809 | 2.230257  |
| O51 | -0.178568 | 5.250809  | -2.230257 |
| O52 | -0.178568 | 5.250809  | 2.230257  |
| O53 | 4.636618  | -2.470760 | -2.230257 |
| O54 | 4.636618  | -2.470760 | 2.230257  |
| O55 | 4.636618  | 2.470760  | -2.230257 |
| O56 | 4.636618  | 2.470760  | 2.230257  |
| O57 | 3.370499  | 0.000000  | -1.563623 |
| O58 | 3.370499  | 0.000000  | 1.563623  |
| O59 | 3.237329  | 0.000000  | -6.172828 |
| O60 | 3.237329  | 0.000000  | 6.172828  |
| O61 | 3.021115  | -2.142279 | 0.000000  |
| O62 | 3.021115  | 2.142279  | 0.000000  |
| O63 | 2.618606  | -1.300448 | -3.711975 |
| O64 | 2.618606  | -1.300448 | 3.711975  |
| O65 | 2.618606  | 1.300448  | -3.711975 |
| O66 | 2.618606  | 1.300448  | 3.711975  |
| O67 | 2.002241  | -3.467983 | -2.158487 |
| O68 | 2.002241  | -3.467983 | 2.158487  |
| O69 | 2.002241  | 3.467983  | -2.158487 |
| O70 | 2.002241  | 3.467983  | 2.158487  |
| O71 | 0.773531  | -1.339795 | -5.695941 |
| O72 | 0.773531  | -1.339795 | 5.695941  |
| O73 | 0.773531  | 1.339795  | -5.695941 |
| O74 | 0.773531  | 1.339795  | 5.695941  |
| O75 | 0.741558  | -1.284417 | -1.544007 |
| O76 | 0.741558  | -1.284417 | 1.544007  |
| O77 | 0.741558  | 1.284417  | -1.544007 |
| O78 | 0.741558  | 1.284417  | 1.544007  |
| O79 | 0.344710  | -3.687502 | 0.000000  |
| O80 | 0.344710  | 3.687502  | 0.000000  |
| O81 | 0.000000  | 0.000000  | -3.609332 |
| O82 | 0.000000  | 0.000000  | 3.609332  |

\* from Ref 16: Vila-Nadal, L.; Sarasa, J. P.; Rodriguez-Forteza, A.; Igual, J.; Kazansky, L. P.; Poblet, J. M. *Chem.-Asian J.* **2010**, *5*, 97-104.

**Table S2.** Cartesian coordinates for  $\beta$ -[SiW<sub>12</sub>O<sub>40</sub>]<sup>4-</sup> in H<sub>2</sub>O\*

|     |           |           |           |
|-----|-----------|-----------|-----------|
| 53  |           |           |           |
| Si1 | 0.000000  | 0.000000  | 0.000548  |
| W2  | 1.076005  | 1.863696  | -2.860965 |
| W3  | -2.152011 | 0.000000  | -2.860965 |
| W4  | 1.076005  | -1.863696 | -2.860965 |
| W5  | -3.153615 | 1.679970  | -0.069004 |
| W6  | 3.031704  | -1.891126 | -0.069004 |
| W7  | 0.121911  | 3.571095  | -0.069004 |
| W8  | 0.121911  | -3.571095 | -0.069004 |
| W9  | -3.153615 | -1.679970 | -0.069004 |
| W10 | 3.031704  | 1.891126  | -0.069004 |
| W11 | -1.965614 | 0.000000  | 2.995605  |
| W12 | 0.982807  | -1.702272 | 2.995605  |
| W13 | 0.982807  | 1.702272  | 2.995605  |
| O14 | 0.772266  | 1.337604  | -0.550167 |
| O15 | -1.544532 | 0.000000  | -0.550167 |
| O16 | 0.000000  | 0.000000  | 1.638736  |
| O17 | 0.772266  | -1.337604 | -0.550167 |
| O18 | -0.746571 | -1.293100 | -3.059254 |
| O19 | 0.166940  | 2.921051  | 1.744921  |
| O20 | -1.651893 | -2.861163 | -0.252398 |
| O21 | 2.446234  | 1.605100  | 1.744921  |
| O22 | -2.613175 | 1.315951  | 1.744921  |
| O23 | 3.303787  | 0.000000  | -0.252398 |
| O24 | -2.613175 | -1.315951 | 1.744921  |
| O25 | 1.493143  | 0.000000  | -3.059254 |
| O26 | 0.166940  | -2.921051 | 1.744921  |
| O27 | -0.746571 | 1.293100  | -3.059254 |
| O28 | 2.446234  | -1.605100 | 1.744921  |
| O29 | -1.651893 | 2.861163  | -0.252398 |
| O30 | 2.051865  | 3.553935  | 0.071111  |
| O31 | -3.203749 | -1.367549 | -1.978771 |
| O32 | -0.773812 | 1.340281  | 3.721025  |
| O33 | 0.417543  | -3.458303 | -1.978771 |
| O34 | 2.786206  | 2.090754  | -1.978771 |
| O35 | -0.773812 | -1.340281 | 3.721025  |
| O36 | 2.786206  | -2.090754 | -1.978771 |
| O37 | -4.103731 | 0.000000  | 0.071111  |
| O38 | -3.203749 | 1.367549  | -1.978771 |
| O39 | 2.051865  | -3.553935 | 0.071111  |
| O40 | 0.417543  | 3.458303  | -1.978771 |
| O41 | 1.547623  | 0.000000  | 3.721025  |
| O42 | 1.436061  | 2.487330  | -4.431442 |
| O43 | -4.458170 | 2.794545  | 0.134324  |
| O44 | 1.605732  | -2.781210 | 4.192213  |
| O45 | 4.649232  | -2.463616 | 0.134324  |
| O46 | -0.191062 | 5.258161  | 0.134324  |
| O47 | 1.605732  | 2.781210  | 4.192213  |

|     |           |           |           |
|-----|-----------|-----------|-----------|
| O48 | -0.191062 | -5.258161 | 0.134324  |
| O49 | -2.872121 | 0.000000  | -4.431442 |
| O50 | -4.458170 | -2.794545 | 0.134324  |
| O51 | 1.436061  | -2.487330 | -4.431442 |
| O52 | 4.649232  | 2.463616  | 0.134324  |
| O53 | -3.211464 | 0.000000  | 4.192213  |

\* from Ref 16: Vila-Nadal, L.; Sarasa, J. P.; Rodriguez-Fortea, A.; Igual, J.; Kazansky, L. P.; Poblet, J. M. *Chem.-Asian J.* **2010**, *5*, 97-104.

**Table S3.** Cartesian coordinates for  $\beta$ -[SiW<sub>12</sub>O<sub>40</sub>]<sup>4-</sup> (DMF)\*

|     |           |           |           |
|-----|-----------|-----------|-----------|
| 53  |           |           |           |
| Si1 | 0.000000  | 0.000000  | 0.000583  |
| W2  | 1.076029  | 1.863738  | -2.861009 |
| W3  | -2.152059 | 0.000000  | -2.861009 |
| W4  | 1.076029  | -1.863738 | -2.861009 |
| W5  | -3.153667 | 1.679954  | -0.069005 |
| W6  | 3.031717  | -1.891179 | -0.069005 |
| W7  | 0.121950  | 3.571133  | -0.069005 |
| W8  | 0.121950  | -3.571133 | -0.069005 |
| W9  | -3.153667 | -1.679954 | -0.069005 |
| W10 | 3.031717  | 1.891179  | -0.069005 |
| W11 | -1.965635 | 0.000000  | 2.995658  |
| W12 | 0.982817  | -1.702290 | 2.995658  |
| W13 | 0.982817  | 1.702290  | 2.995658  |
| O14 | 0.772282  | 1.337632  | -0.550180 |
| O15 | -1.544565 | 0.000000  | -0.550180 |
| O16 | 0.000000  | 0.000000  | 1.638764  |
| O17 | 0.772282  | -1.337632 | -0.550180 |
| O18 | -0.746590 | -1.293132 | -3.059356 |
| O19 | 0.166954  | 2.921122  | 1.744934  |
| O20 | -1.651939 | -2.861242 | -0.252411 |
| O21 | 2.446289  | 1.605148  | 1.744934  |
| O22 | -2.613243 | 1.315974  | 1.744934  |
| O23 | 3.303878  | 0.000000  | -0.252411 |
| O24 | -2.613243 | -1.315974 | 1.744934  |
| O25 | 1.493181  | 0.000000  | -3.059356 |
| O26 | 0.166954  | -2.921122 | 1.744934  |
| O27 | -0.746590 | 1.293132  | -3.059356 |
| O28 | 2.446289  | -1.605148 | 1.744934  |
| O29 | -1.651939 | 2.861242  | -0.252411 |
| O30 | 2.051902  | 3.553998  | 0.071101  |
| O31 | -3.203851 | -1.367561 | -1.978838 |
| O32 | -0.773816 | 1.340289  | 3.721123  |
| O33 | 0.417583  | -3.458397 | -1.978838 |
| O34 | 2.786268  | 2.090835  | -1.978838 |
| O35 | -0.773816 | -1.340289 | 3.721123  |
| O36 | 2.786268  | -2.090835 | -1.978838 |
| O37 | -4.103804 | 0.000000  | 0.071101  |
| O38 | -3.203851 | 1.367561  | -1.978838 |
| O39 | 2.051902  | -3.553998 | 0.071101  |
| O40 | 0.417583  | 3.458397  | -1.978838 |
| O41 | 1.547633  | 0.000000  | 3.721123  |
| O42 | 1.436112  | 2.487419  | -4.431552 |
| O43 | -4.458296 | 2.794598  | 0.134330  |
| O44 | 1.605758  | -2.781255 | 4.192335  |
| O45 | 4.649341  | -2.463699 | 0.134330  |
| O46 | -0.191045 | 5.258297  | 0.134330  |
| O47 | 1.605758  | 2.781255  | 4.192335  |



|     |           |           |           |
|-----|-----------|-----------|-----------|
| O48 | -0.191045 | -5.258297 | 0.134330  |
| O49 | -2.872224 | 0.000000  | -4.431552 |
| O50 | -4.458296 | -2.794598 | 0.134330  |
| O51 | 1.436112  | -2.487419 | -4.431552 |
| O52 | 4.649341  | 2.463699  | 0.134330  |
| O53 | -3.211517 | 0.000000  | 4.192335  |

\* from Ref 16: Vila-Nadal, L.; Sarasa, J. P.; Rodriguez-Fortea, A.; Igual, J.; Kazansky, L. P.; Poblet, J. M. *Chem.-Asian J.* **2010**, *5*, 97-104.

**Table S4.** Cartesian coordinates for  $\gamma$ -[SiW<sub>12</sub>O<sub>40</sub>]<sup>4+</sup> (DMF)\*

|     |           |           |           |
|-----|-----------|-----------|-----------|
| 53  |           |           |           |
| Si1 | 0.000000  | 0.000000  | 0.000625  |
| W2  | 1.519049  | 0.000000  | 3.517011  |
| W3  | -1.519049 | 0.000000  | 3.517011  |
| W4  | 0.000000  | 3.563319  | -0.173331 |
| W5  | 0.000000  | -3.563319 | -0.173331 |
| W6  | 2.983336  | 1.687045  | 0.896882  |
| W7  | -2.983336 | 1.687045  | 0.896882  |
| W8  | -2.983336 | -1.687045 | 0.896882  |
| W9  | 2.983336  | -1.687045 | 0.896882  |
| W10 | 1.695793  | -1.892768 | -2.547251 |
| W11 | -1.695793 | -1.892768 | -2.547251 |
| W12 | -1.695793 | 1.892768  | -2.547251 |
| W13 | 1.695793  | 1.892768  | -2.547251 |
| O14 | 0.000000  | 1.217281  | 3.421290  |
| O15 | 0.000000  | -1.217281 | 3.421290  |
| O16 | 1.755133  | 0.000000  | -2.841552 |
| O17 | -1.755133 | 0.000000  | -2.841552 |
| O18 | 1.438551  | -2.875551 | 0.871606  |
| O19 | -1.438551 | -2.875551 | 0.871606  |
| O20 | -1.438551 | 2.875551  | 0.871606  |
| O21 | 1.438551  | 2.875551  | 0.871606  |
| O22 | 2.836374  | -1.604943 | -0.995975 |
| O23 | 2.836374  | 1.604943  | -0.995975 |
| O24 | -2.836374 | -1.604943 | -0.995975 |
| O25 | -2.836374 | 1.604943  | -0.995975 |
| O26 | 0.000000  | -2.009776 | -3.470298 |
| O27 | 0.000000  | 2.009776  | -3.470298 |
| O28 | 2.624674  | -1.369825 | 2.795371  |
| O29 | -2.624674 | -1.369825 | 2.795371  |
| O30 | -2.624674 | 1.369825  | 2.795371  |
| O31 | 2.624674  | 1.369825  | 2.795371  |
| O32 | 3.928145  | 0.000000  | 0.903067  |
| O33 | -3.928145 | 0.000000  | 0.903067  |
| O34 | -1.265952 | -3.540397 | -1.665054 |
| O35 | 1.265952  | -3.540397 | -1.665054 |
| O36 | -1.265952 | 3.540397  | -1.665054 |
| O37 | 1.265952  | 3.540397  | -1.665054 |
| O38 | -1.928286 | 0.000000  | 5.194121  |
| O39 | 1.928286  | 0.000000  | 5.194121  |
| O40 | 2.799810  | 2.460372  | -3.748750 |
| O41 | -2.799810 | -2.460372 | -3.748750 |
| O42 | -2.799810 | 2.460372  | -3.748750 |
| O43 | 2.799810  | -2.460372 | -3.748750 |
| O44 | 4.289435  | -2.805097 | 1.071806  |
| O45 | -4.289435 | -2.805097 | 1.071806  |
| O46 | -4.289435 | 2.805097  | 1.071806  |
| O47 | 4.289435  | 2.805097  | 1.071806  |

|     |           |           |           |
|-----|-----------|-----------|-----------|
| O48 | 0.000000  | -5.243124 | 0.235535  |
| O49 | 0.000000  | 5.243124  | 0.235535  |
| O50 | 0.000000  | -1.337347 | -0.969176 |
| O51 | 0.000000  | 1.337347  | -0.969176 |
| O52 | -1.352255 | 0.000000  | 0.929991  |
| O53 | 1.352255  | 0.000000  | 0.929991  |

\* from Ref 16: Vila-Nadal, L.; Sarasa, J. P.; Rodriguez-Fortea, A.; Igual, J.; Kazansky, L. P.; Poblet, J. M. *Chem.-Asian J.* **2010**, *5*, 97-104.

**Table S5.** Cartesian coordinates for  $[W_{10}O_{32}]^{4-}$  (DMF)\*

|    |           |           |           |
|----|-----------|-----------|-----------|
| 42 |           |           |           |
| W  | 2.345892  | 0.000000  | 1.909503  |
| W  | -2.345892 | 0.000000  | 1.909503  |
| W  | 2.345892  | 0.000000  | -1.909503 |
| W  | -2.345892 | 0.000000  | -1.909503 |
| W  | 0.000000  | 2.345892  | 1.909503  |
| W  | 0.000000  | -2.345892 | 1.909503  |
| W  | 0.000000  | 2.345892  | -1.909503 |
| W  | 0.000000  | -2.345892 | -1.909503 |
| W  | 0.000000  | 0.000000  | 4.278590  |
| W  | 0.000000  | 0.000000  | -4.278590 |
| O  | 0.000000  | 0.000000  | 1.934162  |
| O  | 0.000000  | 0.000000  | -1.934162 |
| O  | 1.875500  | 1.875500  | 1.891218  |
| O  | -1.875500 | 1.875500  | 1.891218  |
| O  | 1.875500  | -1.875500 | 1.891218  |
| O  | -1.875500 | -1.875500 | 1.891218  |
| O  | 1.875500  | 1.875500  | -1.891218 |
| O  | -1.875500 | 1.875500  | -1.891218 |
| O  | 1.875500  | -1.875500 | -1.891218 |
| O  | -1.875500 | -1.875500 | -1.891218 |
| O  | 0.000000  | 1.873195  | 3.812005  |
| O  | 0.000000  | -1.873195 | 3.812005  |
| O  | 0.000000  | 1.873195  | -3.812005 |
| O  | 0.000000  | -1.873195 | -3.812005 |
| O  | 0.000000  | 2.285599  | 0.000000  |
| O  | 0.000000  | -2.285599 | 0.000000  |
| O  | 1.873195  | 0.000000  | 3.812005  |
| O  | -1.873195 | 0.000000  | 3.812005  |
| O  | 1.873195  | 0.000000  | -3.812005 |
| O  | -1.873195 | 0.000000  | -3.812005 |
| O  | 2.285599  | 0.000000  | 0.000000  |
| O  | -2.285599 | 0.000000  | 0.000000  |
| O  | 4.061944  | 0.000000  | 2.145018  |
| O  | -4.061944 | 0.000000  | 2.145018  |
| O  | 4.061944  | 0.000000  | -2.145018 |
| O  | -4.061944 | 0.000000  | -2.145018 |
| O  | 0.000000  | 0.000000  | 6.017610  |
| O  | 0.000000  | 0.000000  | -6.017610 |
| O  | 0.000000  | 4.061944  | 2.145018  |
| O  | 0.000000  | -4.061944 | 2.145018  |
| O  | 0.000000  | 4.061944  | -2.145018 |
| O  | 0.000000  | -4.061944 | -2.145018 |

\* from Ref 16: Vila-Nadal, L.; Sarasa, J. P.; Rodriguez-Fortea, A.; Igual, J.; Kazansky, L. P.; Poblet, J. M. *Chem.-Asian J.* **2010**, *5*, 97-104.

**Table S6.** Cartesian coordinates for  $[8K]C[H_{16}P_8W_{48}O_{184}]^{16-}$ 

264

|   |          |           |           |
|---|----------|-----------|-----------|
| W | 5.25483  | -18.87234 | -19.73284 |
| W | 21.52547 | -7.90795  | -19.73284 |
| W | 18.87234 | -21.52547 | -19.73284 |
| W | 7.90795  | -5.25483  | -19.73284 |
| W | 5.25483  | -7.90795  | -19.73284 |
| W | 21.52547 | -18.87234 | -19.73284 |
| W | 18.87234 | -5.25483  | -19.73284 |
| W | 7.90795  | -21.52547 | -19.73284 |
| W | 21.52547 | -18.87234 | -23.09016 |
| W | 5.25483  | -7.90795  | -23.09016 |
| W | 7.90795  | -21.52547 | -23.09016 |
| W | 18.87234 | -5.25483  | -23.09016 |
| W | 21.52547 | -7.90795  | -23.09016 |
| W | 5.25483  | -18.87234 | -23.09016 |
| W | 7.90795  | -5.25483  | -23.09016 |
| W | 18.87234 | -21.52547 | -23.09016 |
| W | 7.61953  | -16.47604 | -18.03662 |
| W | 19.16076 | -10.30425 | -18.03662 |
| W | 16.47604 | -19.16076 | -18.03662 |
| W | 10.30425 | -7.61953  | -18.03662 |
| W | 7.61953  | -10.30425 | -18.03662 |
| W | 19.16076 | -16.47604 | -18.03662 |
| W | 16.47604 | -7.61953  | -18.03662 |
| W | 10.30425 | -19.16076 | -18.03662 |
| W | 19.16076 | -16.47604 | -24.78638 |
| W | 7.61953  | -10.30425 | -24.78638 |
| W | 10.30425 | -19.16076 | -24.78638 |
| W | 16.47604 | -7.61953  | -24.78638 |
| W | 19.16076 | -10.30425 | -24.78638 |
| W | 7.61953  | -16.47604 | -24.78638 |
| W | 10.30425 | -7.61953  | -24.78638 |
| W | 16.47604 | -19.16076 | -24.78638 |
| W | 4.55479  | -15.24013 | -19.73905 |
| W | 22.22550 | -11.54016 | -19.73905 |
| W | 15.24013 | -22.22550 | -19.73905 |
| W | 11.54016 | -4.55479  | -19.73905 |
| W | 4.55479  | -11.54016 | -19.73905 |
| W | 22.22550 | -15.24013 | -19.73905 |
| W | 15.24013 | -4.55479  | -19.73905 |
| W | 11.54016 | -22.22550 | -19.73905 |
| W | 22.22550 | -15.24013 | -23.08395 |
| W | 4.55479  | -11.54016 | -23.08395 |
| W | 11.54016 | -22.22550 | -23.08395 |
| W | 15.24013 | -4.55479  | -23.08395 |
| W | 22.22550 | -11.54016 | -23.08395 |
| W | 4.55479  | -15.24013 | -23.08395 |
| W | 11.54016 | -4.55479  | -23.08395 |

|   |          |           |           |
|---|----------|-----------|-----------|
| W | 15.24013 | -22.22550 | -23.08395 |
| P | 19.55230 | -16.60566 | -21.41150 |
| P | 7.22800  | -10.17464 | -21.41150 |
| P | 10.17464 | -19.55230 | -21.41150 |
| P | 16.60566 | -7.22800  | -21.41150 |
| P | 7.22800  | -16.60566 | -21.41150 |
| P | 19.55230 | -10.17464 | -21.41150 |
| P | 16.60566 | -19.55230 | -21.41150 |
| P | 10.17464 | -7.22800  | -21.41150 |
| O | 4.12149  | -19.55230 | -18.62372 |
| O | 22.65881 | -7.22800  | -18.62372 |
| O | 19.55230 | -22.65881 | -18.62372 |
| O | 7.22800  | -4.12149  | -18.62372 |
| O | 4.12149  | -7.22800  | -18.62372 |
| O | 22.65881 | -19.55230 | -18.62372 |
| O | 19.55230 | -4.12149  | -18.62372 |
| O | 7.22800  | -22.65881 | -18.62372 |
| O | 22.65881 | -19.55230 | -24.19928 |
| O | 4.12149  | -7.22800  | -24.19928 |
| O | 7.22800  | -22.65881 | -24.19928 |
| O | 19.55230 | -4.12149  | -24.19928 |
| O | 22.65881 | -7.22800  | -24.19928 |
| O | 4.12149  | -19.55230 | -24.19928 |
| O | 7.22800  | -4.12149  | -24.19928 |
| O | 19.55230 | -22.65881 | -24.19928 |
| O | 6.48887  | -18.09009 | -18.60445 |
| O | 20.29143 | -8.69021  | -18.60445 |
| O | 18.09009 | -20.29143 | -18.60445 |
| O | 8.69021  | -6.48887  | -18.60445 |
| O | 6.48887  | -8.69021  | -18.60445 |
| O | 20.29143 | -18.09009 | -18.60445 |
| O | 18.09009 | -6.48887  | -18.60445 |
| O | 8.69021  | -20.29143 | -18.60445 |
| O | 20.29143 | -18.09009 | -24.21855 |
| O | 6.48887  | -8.69021  | -24.21855 |
| O | 8.69021  | -20.29143 | -24.21855 |
| O | 18.09009 | -6.48887  | -24.21855 |
| O | 20.29143 | -8.69021  | -24.21855 |
| O | 6.48887  | -18.09009 | -24.21855 |
| O | 8.69021  | -6.48887  | -24.21855 |
| O | 18.09009 | -20.29143 | -24.21855 |
| O | 4.38661  | -17.16349 | -19.85489 |
| O | 22.39368 | -9.61680  | -19.85489 |
| O | 17.16349 | -22.39368 | -19.85489 |
| O | 9.61680  | -4.38661  | -19.85489 |
| O | 4.38661  | -9.61680  | -19.85489 |
| O | 22.39368 | -17.16349 | -19.85489 |
| O | 17.16349 | -4.38661  | -19.85489 |
| O | 9.61680  | -22.39368 | -19.85489 |
| O | 22.39368 | -17.16349 | -22.96812 |

|   |          |           |           |
|---|----------|-----------|-----------|
| O | 4.38661  | -9.61680  | -22.96812 |
| O | 9.61680  | -22.39368 | -22.96812 |
| O | 17.16349 | -4.38661  | -22.96812 |
| O | 22.39368 | -9.61680  | -22.96812 |
| O | 4.38661  | -17.16349 | -22.96812 |
| O | 9.61680  | -4.38661  | -22.96812 |
| O | 17.16349 | -22.39368 | -22.96812 |
| O | 6.36032  | -20.41998 | -19.92126 |
| O | 20.41998 | -6.36032  | -19.92126 |
| O | 20.41998 | -20.41998 | -19.92126 |
| O | 6.36032  | -6.36032  | -19.92126 |
| O | 20.41998 | -20.41998 | -22.90174 |
| O | 6.36032  | -6.36032  | -22.90174 |
| O | 6.36032  | -20.41998 | -22.90174 |
| O | 20.41998 | -6.36032  | -22.90174 |
| O | 22.36155 | -19.35948 | -21.41150 |
| O | 4.41875  | -7.42082  | -21.41150 |
| O | 7.42082  | -22.36155 | -21.41150 |
| O | 19.35948 | -4.41875  | -21.41150 |
| O | 4.41875  | -19.35948 | -21.41150 |
| O | 22.36155 | -7.42082  | -21.41150 |
| O | 19.35948 | -22.36155 | -21.41150 |
| O | 7.42082  | -4.41875  | -21.41150 |
| O | 20.25126 | -18.00707 | -21.41150 |
| O | 6.52904  | -8.77322  | -21.41150 |
| O | 8.77322  | -20.25126 | -21.41150 |
| O | 18.00707 | -6.52904  | -21.41150 |
| O | 6.52904  | -18.00707 | -21.41150 |
| O | 20.25126 | -8.77322  | -21.41150 |
| O | 18.00707 | -20.25126 | -21.41150 |
| O | 8.77322  | -6.52904  | -21.41150 |
| O | 7.15034  | -16.61985 | -16.36909 |
| O | 19.62996 | -10.16045 | -16.36909 |
| O | 16.61985 | -19.62996 | -16.36909 |
| O | 10.16045 | -7.15034  | -16.36909 |
| O | 7.15034  | -10.16045 | -16.36909 |
| O | 19.62996 | -16.61985 | -16.36909 |
| O | 16.61985 | -7.15034  | -16.36909 |
| O | 10.16045 | -19.62996 | -16.36909 |
| O | 19.62996 | -16.61985 | -26.45391 |
| O | 7.15034  | -10.16045 | -26.45391 |
| O | 10.16045 | -19.62996 | -26.45391 |
| O | 16.61985 | -7.15034  | -26.45391 |
| O | 19.62996 | -10.16045 | -26.45391 |
| O | 7.15034  | -16.61985 | -26.45391 |
| O | 10.16045 | -7.15034  | -26.45391 |
| O | 16.61985 | -19.62996 | -26.45391 |
| O | 8.55363  | -14.97019 | -17.97067 |
| O | 18.22667 | -11.81011 | -17.97067 |
| O | 14.97019 | -18.22667 | -17.97067 |

|   |          |           |           |
|---|----------|-----------|-----------|
| O | 11.81011 | -8.55363  | -17.97067 |
| O | 8.55363  | -11.81011 | -17.97067 |
| O | 18.22667 | -14.97019 | -17.97067 |
| O | 14.97019 | -8.55363  | -17.97067 |
| O | 11.81011 | -18.22667 | -17.97067 |
| O | 18.22667 | -14.97019 | -24.85233 |
| O | 8.55363  | -11.81011 | -24.85233 |
| O | 11.81011 | -18.22667 | -24.85233 |
| O | 14.97019 | -8.55363  | -24.85233 |
| O | 18.22667 | -11.81011 | -24.85233 |
| O | 8.55363  | -14.97019 | -24.85233 |
| O | 11.81011 | -8.55363  | -24.85233 |
| O | 14.97019 | -18.22667 | -24.85233 |
| O | 9.09727  | -17.68303 | -17.96211 |
| O | 17.68303 | -9.09727  | -17.96211 |
| O | 17.68303 | -17.68303 | -17.96211 |
| O | 9.09727  | -9.09727  | -17.96211 |
| O | 17.68303 | -17.68303 | -24.86089 |
| O | 9.09727  | -9.09727  | -24.86089 |
| O | 9.09727  | -17.68303 | -24.86089 |
| O | 17.68303 | -9.09727  | -24.86089 |
| O | 6.02557  | -15.50311 | -18.60445 |
| O | 20.75473 | -11.27718 | -18.60445 |
| O | 15.50311 | -20.75473 | -18.60445 |
| O | 11.27718 | -6.02557  | -18.60445 |
| O | 6.02557  | -11.27718 | -18.60445 |
| O | 20.75473 | -15.50311 | -18.60445 |
| O | 15.50311 | -6.02557  | -18.60445 |
| O | 11.27718 | -20.75473 | -18.60445 |
| O | 20.75473 | -15.50311 | -24.21855 |
| O | 6.02557  | -11.27718 | -24.21855 |
| O | 11.27718 | -20.75473 | -24.21855 |
| O | 15.50311 | -6.02557  | -24.21855 |
| O | 20.75473 | -11.27718 | -24.21855 |
| O | 6.02557  | -15.50311 | -24.21855 |
| O | 11.27718 | -6.02557  | -24.21855 |
| O | 15.50311 | -20.75473 | -24.21855 |
| O | 8.04480  | -16.40561 | -20.15465 |
| O | 18.73549 | -10.37469 | -20.15465 |
| O | 16.40561 | -18.73549 | -20.15465 |
| O | 10.37469 | -8.04480  | -20.15465 |
| O | 8.04480  | -10.37469 | -20.15465 |
| O | 18.73549 | -16.40561 | -20.15465 |
| O | 16.40561 | -8.04480  | -20.15465 |
| O | 10.37469 | -18.73549 | -20.15465 |
| O | 18.73549 | -16.40561 | -22.66836 |
| O | 8.04480  | -10.37469 | -22.66836 |
| O | 10.37469 | -18.73549 | -22.66836 |
| O | 16.40561 | -8.04480  | -22.66836 |
| O | 18.73549 | -10.37469 | -22.66836 |



|   |          |           |           |
|---|----------|-----------|-----------|
| O | 8.04480  | -16.40561 | -22.66836 |
| O | 10.37469 | -8.04480  | -22.66836 |
| O | 16.40561 | -18.73549 | -22.66836 |
| O | 3.24845  | -14.94340 | -18.68368 |
| O | 23.53185 | -11.83689 | -18.68368 |
| O | 14.94340 | -23.53185 | -18.68368 |
| O | 11.83689 | -3.24845  | -18.68368 |
| O | 3.24845  | -11.83689 | -18.68368 |
| O | 23.53185 | -14.94340 | -18.68368 |
| O | 14.94340 | -3.24845  | -18.68368 |
| O | 11.83689 | -23.53185 | -18.68368 |
| O | 23.53185 | -14.94340 | -24.13932 |
| O | 3.24845  | -11.83689 | -24.13932 |
| O | 11.83689 | -23.53185 | -24.13932 |
| O | 14.94340 | -3.24845  | -24.13932 |
| O | 23.53185 | -11.83689 | -24.13932 |
| O | 3.24845  | -14.94340 | -24.13932 |
| O | 11.83689 | -3.24845  | -24.13932 |
| O | 14.94340 | -23.53185 | -24.13932 |
| O | 5.12575  | -13.39015 | -19.88486 |
| O | 21.65455 | -13.39015 | -19.88486 |
| O | 13.39015 | -21.65455 | -19.88486 |
| O | 13.39015 | -5.12575  | -19.88486 |
| O | 21.65455 | -13.39015 | -22.93814 |
| O | 5.12575  | -13.39015 | -22.93814 |
| O | 13.39015 | -21.65455 | -22.93814 |
| O | 13.39015 | -5.12575  | -22.93814 |
| O | 23.15960 | -15.05588 | -21.41150 |
| O | 3.62070  | -11.72441 | -21.41150 |
| O | 11.72441 | -23.15960 | -21.41150 |
| O | 15.05588 | -3.62070  | -21.41150 |
| O | 3.62070  | -15.05588 | -21.41150 |
| O | 23.15960 | -11.72441 | -21.41150 |
| O | 15.05588 | -23.15960 | -21.41150 |
| O | 11.72441 | -3.62070  | -21.41150 |
| O | 20.68242 | -15.52722 | -21.41150 |
| O | 6.09787  | -11.25308 | -21.41150 |
| O | 11.25308 | -20.68242 | -21.41150 |
| O | 15.52722 | -6.09787  | -21.41150 |
| O | 6.09787  | -15.52722 | -21.41150 |
| O | 20.68242 | -11.25308 | -21.41150 |
| O | 15.52722 | -20.68242 | -21.41150 |
| O | 11.25308 | -6.09787  | -21.41150 |
| K | 18.93367 | -13.39015 | -21.41150 |
| K | 7.84663  | -13.39015 | -21.41150 |
| K | 13.39015 | -18.93367 | -21.41150 |
| K | 13.39015 | -7.84663  | -21.41150 |
| K | 10.61839 | -16.16191 | -21.41150 |
| K | 10.61839 | -10.61839 | -21.41150 |
| K | 16.16191 | -16.16191 | -21.41150 |

|   |          |           |           |
|---|----------|-----------|-----------|
| K | 16.16191 | -10.61839 | -21.41150 |
| H | 8.58911  | -14.65154 | -17.05519 |
| H | 18.19119 | -12.12876 | -17.05519 |
| H | 14.65154 | -18.19119 | -17.05519 |
| H | 12.12876 | -8.58911  | -17.05519 |
| H | 8.58911  | -12.12876 | -17.05519 |
| H | 18.19119 | -14.65154 | -17.05519 |
| H | 14.65154 | -8.58911  | -17.05519 |
| H | 12.12876 | -18.19119 | -17.05519 |
| H | 18.19119 | -14.65154 | -25.76781 |
| H | 8.58911  | -12.12876 | -25.76781 |
| H | 12.12876 | -18.19119 | -25.76781 |
| H | 14.65154 | -8.58911  | -25.76781 |
| H | 18.19119 | -12.12876 | -25.76781 |
| H | 8.58911  | -14.65154 | -25.76781 |
| H | 12.12876 | -8.58911  | -25.76781 |
| H | 14.65154 | -18.19119 | -25.76781 |

**Table S7.** Computed parameters to calculate  $^{183}\text{W}$  chemical shifts relative to  $\text{WO}_4^{2-}$  for $[\text{8K}]\text{C}[\text{H}_n\text{P}_8\text{W}_{48}\text{O}_{184}]^{(32-n)-}$ .

| $[\text{8K}]\text{C}[\text{H}_n\text{P}_8\text{W}_{48}\text{O}_{184}]^{(32-n)-}$ | Site | Computed parameters<br>by PACHA |               |                                       |          |                                   |                                  | Experimental<br>data               |                                |     |
|----------------------------------------------------------------------------------|------|---------------------------------|---------------|---------------------------------------|----------|-----------------------------------|----------------------------------|------------------------------------|--------------------------------|-----|
|                                                                                  |      | $\Delta E^a$<br>(eV)            | $q(\text{W})$ | $\langle (a_0/r)^3 \rangle^b$<br>(au) | $P_u^c$  | $\sigma_{\text{para}}^d$<br>(ppm) | $\sigma_{\text{dia}}^d$<br>(ppm) | $\delta_{\text{PACHA}}^e$<br>(ppm) | $\delta_{\text{exp}}$<br>(ppm) | pH  |
| $[\text{8K}]\text{C}[\text{H}_{16}\text{P}_8\text{W}_{48}\text{O}_{184}]^{16-}$  | W3   | 3.3121                          | 8.7403        | 19.0140                               | 81.56054 | -8654.7                           | 8689.0                           | -210.2                             | -207.7                         | 1.1 |
|                                                                                  | W1   |                                 | 1.8562        | 218.9284                              | 31.56884 | -8661.6                           | 8689.2                           | -203.4                             | -205.9                         |     |
|                                                                                  | W2   |                                 | 1.7537        | 718.4356                              | 41.61510 | -8684.8                           | 8690.0                           | -181.0                             | -180.9                         |     |
| $[\text{8K}]\text{C}[\text{H}_{15}\text{P}_8\text{W}_{48}\text{O}_{184}]^{17-}$  | W3   | 3.3131                          | 8.6048        | 18.9489                               | 31.56686 | -8657.0                           | 8689.1                           | -207.9                             | -208.5                         | 1.3 |
|                                                                                  | W1   |                                 | 1.8474        | 418.8862                              | 11.57291 | -8661.7                           | 8689.2                           | -203.4                             | -203.9                         |     |
|                                                                                  | W2   |                                 | 1.7428        | 118.3829                              | 21.61989 | -8682.7                           | 8690.1                           | -183.2                             | -182.7                         |     |
| $[\text{8K}]\text{C}[\text{H}_{14}\text{P}_8\text{W}_{48}\text{O}_{184}]^{18-}$  | W3   | 3.3141                          | 8.4694        | 18.8837                               | 91.57314 | -8659.2                           | 8689.2                           | -205.8                             |                                |     |
|                                                                                  | W1   |                                 | 1.8384        | 818.8431                              | 01.57704 | -8661.9                           | 8689.3                           | -203.2                             |                                |     |
|                                                                                  | W2   |                                 | 1.7317        | 818.3298                              | 61.62469 | -8680.6                           | 8690.2                           | -185.4                             |                                |     |
| $[\text{8K}]\text{C}[\text{H}_{13}\text{P}_8\text{W}_{48}\text{O}_{184}]^{19-}$  | W3   | 3.3151                          | 8.3335        | 18.8184                               | 01.57940 | -8661.2                           | 8689.4                           | -203.9                             |                                |     |
|                                                                                  | W1   |                                 | 1.8294        | 118.7994                              | 71.58120 | -8662.4                           | 8689.4                           | -202.8                             |                                |     |
|                                                                                  | W2   |                                 | 1.7206        | 318.2762                              | 51.62950 | -8678.5                           | 8690.2                           | -187.5                             |                                |     |
| $[\text{8K}]\text{C}[\text{H}_{12}\text{P}_8\text{W}_{48}\text{O}_{184}]^{20-}$  | W3   | 3.3161                          | 8.1974        | 18.7529                               | 61.58561 | -8663.1                           | 8689.5                           | -202.2                             | -199.8                         | 2.2 |
|                                                                                  | W1   |                                 | 1.8201        | 818.7550                              | 81.58541 | -8662.9                           | 8689.5                           | -202.3                             | -206.2                         |     |
|                                                                                  | W2   |                                 | 1.7095        | 218.2227                              | 91.63426 | -8676.4                           | 8690.3                           | -189.7                             | -189.7                         |     |
| $[\text{8K}]\text{C}[\text{H}_{11}\text{P}_8\text{W}_{48}\text{O}_{184}]^{21-}$  | W3   | 3.3161                          | 8.0615        | 18.6875                               | 61.59178 | -8664.7                           | 8689.6                           | -200.6                             |                                |     |
|                                                                                  | W1   |                                 | 1.8105        | 918.7089                              | 51.58976 | -8663.6                           | 8689.5                           | -201.7                             |                                |     |
|                                                                                  | W2   |                                 | 1.6983        | 718.1691                              | 71.63902 | -8674.4                           | 8690.4                           | -191.9                             |                                |     |
| $[\text{8K}]\text{C}[\text{H}_{10}\text{P}_8\text{W}_{48}\text{O}_{184}]^{22-}$  | W3   | 3.3171                          | 7.9248        | 18.6218                               | 41.59793 | -8666.3                           | 8689.7                           | -199.2                             |                                |     |
|                                                                                  | W1   |                                 | 1.8008        | 918.6622                              | 81.59415 | -8664.5                           | 8689.6                           | -200.9                             |                                |     |
|                                                                                  | W2   |                                 | 1.6871        | 318.1150                              | 81.64378 | -8672.3                           | 8690.5                           | -194.0                             |                                |     |
| $[\text{8K}]\text{C}[\text{H}_9\text{P}_8\text{W}_{48}\text{O}_{184}]^{23-}$     | W3   | 3.3171                          | 7.7887        | 18.5563                               | 81.60401 | -8667.6                           | 8689.8                           | -198.0                             | -197.8                         | 3.1 |
|                                                                                  | W1   |                                 | 1.7908        | 718.6141                              | 01.59864 | -8665.5                           | 8689.7                           | -200.0                             | -202.5                         |     |
|                                                                                  | W2   |                                 | 1.6759        | 918.0615                              | 21.64846 | -8670.3                           | 8690.6                           | -196.1                             | -196.5                         |     |
| $[\text{8K}]\text{C}[\text{H}_8\text{P}_8\text{W}_{48}\text{O}_{184}]^{24-}$     | W3   | 3.3181                          | 7.6521        | 18.4906                               | 31.61007 | -8668.9                           | 8689.9                           | -196.8                             |                                |     |
|                                                                                  | W1   |                                 | 1.7807        | 418.5653                              | 31.60317 | -8666.6                           | 8689.8                           | -199.0                             |                                |     |
|                                                                                  | W2   |                                 | 1.6647        | 818.0075                              | 91.65315 | -8668.3                           | 8690.7                           | -198.2                             |                                |     |
| $[\text{8K}]\text{C}[\text{H}_7\text{P}_8\text{W}_{48}\text{O}_{184}]^{25-}$     | W3   | 3.3181                          | 7.5155        | 18.4249                               | 41.61607 | -8670.0                           | 8690.0                           | -195.8                             |                                |     |
|                                                                                  | W1   |                                 | 1.7706        | 618.5168                              | 51.60765 | -8667.7                           | 8689.9                           | -197.9                             |                                |     |
|                                                                                  | W2   |                                 | 1.6535        | 017.9533                              | 51.65783 | -8666.3                           | 8690.8                           | -200.2                             |                                |     |
| $[\text{8K}]\text{C}[\text{H}_6\text{P}_8\text{W}_{48}\text{O}_{184}]^{26-}$     | W3   | 3.3181                          | 7.3785        | 18.3590                               | 51.62205 | -8670.9                           | 8690.1                           | -195.0                             | -194.2                         | 4.0 |
|                                                                                  | W1   |                                 | 1.7604        | 618.4678                              | 11.61215 | -8669.0                           | 8689.9                           | -196.7                             | -198.9                         |     |
|                                                                                  | W2   |                                 | 1.6422        | 317.8991                              | 01.66248 | -8664.4                           | 8690.9                           | -202.3                             | -202.2                         |     |

---

|                                                                                       |    |                             |         |        |        |        |     |
|---------------------------------------------------------------------------------------|----|-----------------------------|---------|--------|--------|--------|-----|
| [8K]C[H <sub>5</sub> P <sub>8</sub> W <sub>48</sub> O <sub>184</sub> ] <sup>27-</sup> | W3 | 3.3181.7241318.293091.62799 | -8671.8 | 8690.2 | -194.2 |        |     |
|                                                                                       | W1 | 1.7501018.418001.61670      | -8670.4 | 8690.0 | -195.4 |        |     |
|                                                                                       | W2 | 1.6309017.844631.66711      | -8662.5 | 8691.0 | -204.3 |        |     |
| [8K]C[H <sub>4</sub> P <sub>8</sub> W <sub>48</sub> O <sub>184</sub> ] <sup>28-</sup> | W3 | 3.3171.7105018.227511.63385 | -8672.5 | 8690.3 | -193.6 |        |     |
|                                                                                       | W1 | 1.7394518.366751.62135      | -8671.9 | 8690.1 | -194.0 |        |     |
|                                                                                       | W2 | 1.6196517.790491.67169      | -8660.6 | 8691.0 | -206.2 |        |     |
| [8K]C[H <sub>3</sub> P <sub>8</sub> W <sub>48</sub> O <sub>184</sub> ] <sup>29-</sup> | W3 | 3.3171.6967518.161351.63971 | -8673.1 | 8690.4 | -193.1 | -193.9 | 5.0 |
|                                                                                       | W1 | 1.7284918.314021.62610      | -8673.4 | 8690.2 | -192.6 | -191.4 |     |
|                                                                                       | W2 | 1.6083217.736031.67626      | -8658.8 | 8691.1 | -208.1 | -206.3 |     |
| [8K]C[H <sub>2</sub> P <sub>8</sub> W <sub>48</sub> O <sub>184</sub> ] <sup>30-</sup> | W3 | 3.3161.6830018.095211.64552 | -8673.6 | 8690.5 | -192.7 | -193.3 | 5.8 |
|                                                                                       | W1 | 1.7172918.260151.63093      | -8675.1 | 8690.3 | -191.0 | -191.1 |     |
|                                                                                       | W2 | 1.5970017.681591.68080      | -8657.1 | 8691.2 | -210.0 | -208.5 |     |
| [8K]C[HP <sub>8</sub> W <sub>48</sub> O <sub>184</sub> ] <sup>31-</sup>               | W3 | 3.3161.6692318.028991.65129 | -8674.0 | 8690.7 | -192.4 |        |     |
|                                                                                       | W1 | 1.7058518.205141.63583      | -8676.7 | 8690.4 | -189.4 |        |     |
|                                                                                       | W2 | 1.5857117.627261.68530      | -8655.4 | 8691.3 | -211.7 |        |     |
| [8K]C[P <sub>8</sub> W <sub>48</sub> O <sub>184</sub> ] <sup>32-</sup>                | W3 | 3.3151.6554517.962731.65702 | -8674.3 | 8690.8 | -192.2 |        |     |
|                                                                                       | W1 | 1.6941718.148941.64080      | -8678.5 | 8690.5 | -187.8 |        |     |
|                                                                                       | W2 | 1.5744917.573311.68973      | -8653.8 | 8691.4 | -213.4 |        |     |

---

<sup>a)</sup> calculated for  $\delta_{\text{mean}} = -20.6$  ppm. <sup>b)</sup> calculated according to eq (5) with  $f = 0.481$  and  $\text{efg}^\circ = 10$  au. <sup>c)</sup> calculated

according to eq (4). <sup>d)</sup> calculated according to eq (2b). <sup>e)</sup> calculated according to eq (1) with  $\sigma_{\text{ref}} = -175.8$  ppm.
